# Supplementary material
Source: publisher figshare collection journal article supplement (https://gsajournals.figshare.com/articles/dataset/_/7848395)
Supplement: Supplementary file 1 [file 1]

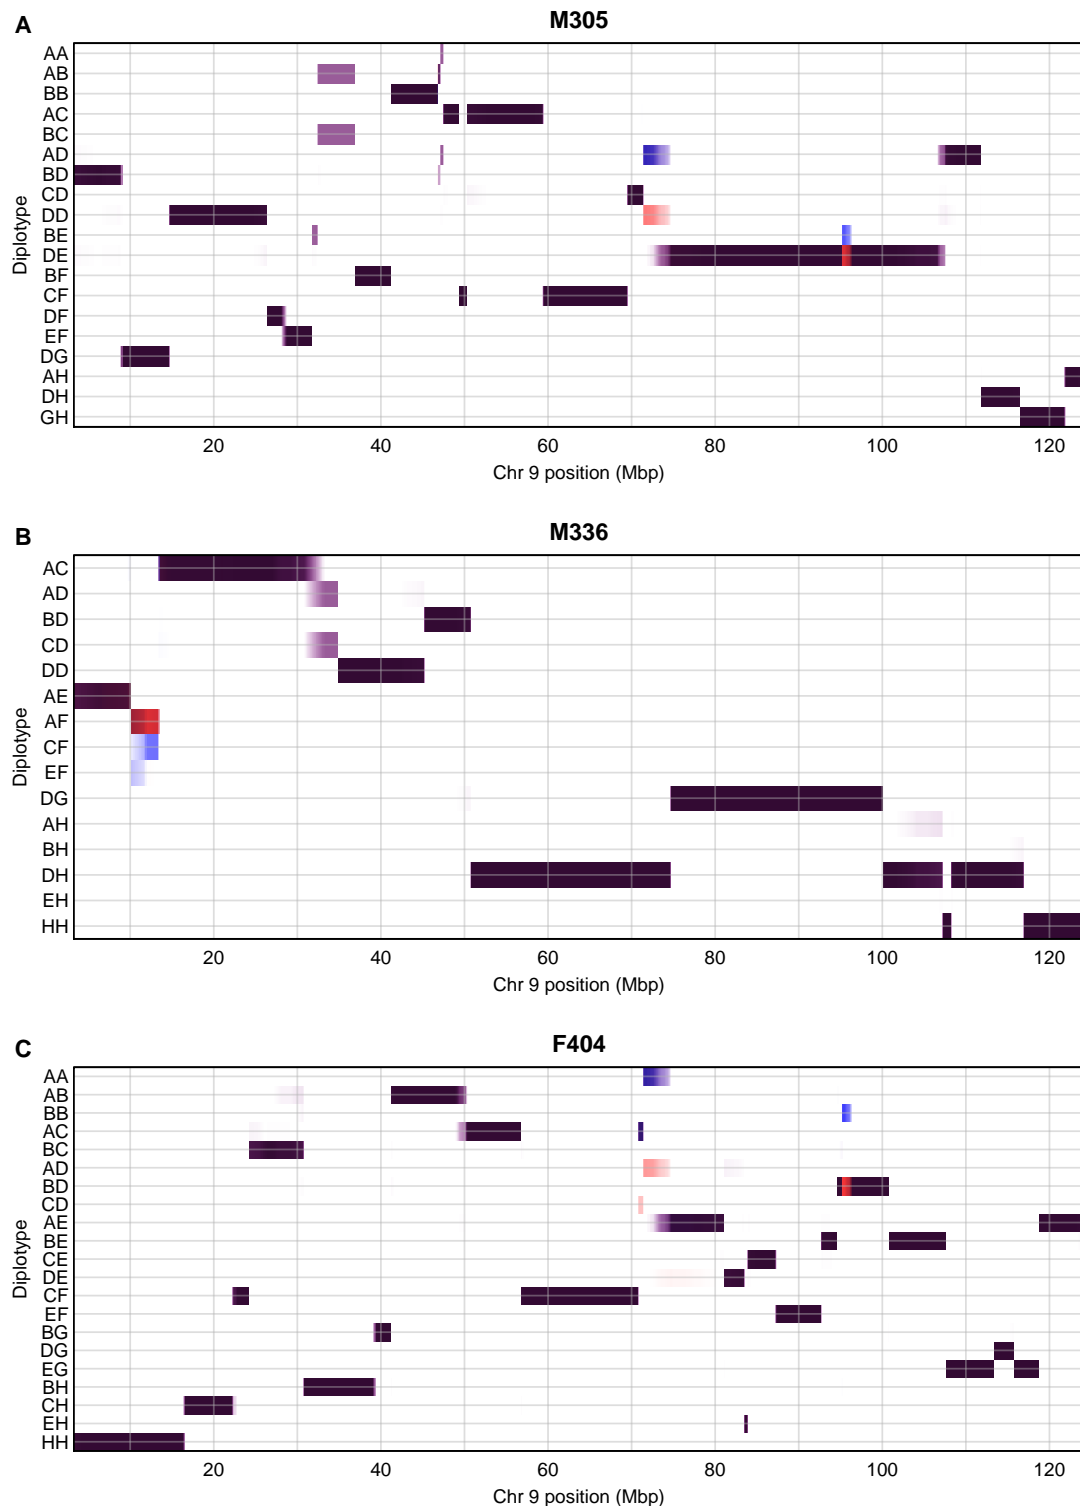

**Figure S9** Bivariate heatmaps displaying diplotype probabilities before and after omitting badly behaved markers, for three selected individuals on chromosome 9. Probabilities before and after omitting markers are shown in white/blue and white/red color scales, respectively. Only diplotypes that achieved probability  $> 0.25$  are shown. Dark purple indicates the probability was high both before and after data cleaning, blue indicates high before data cleaning but low after, and red indicates low before but high after.
