# Supplementary material
Source: publisher figshare collection journal article supplement (https://gsajournals.figshare.com/articles/dataset/_/7848395)
Supplement: Supplementary file 3 [file 1]

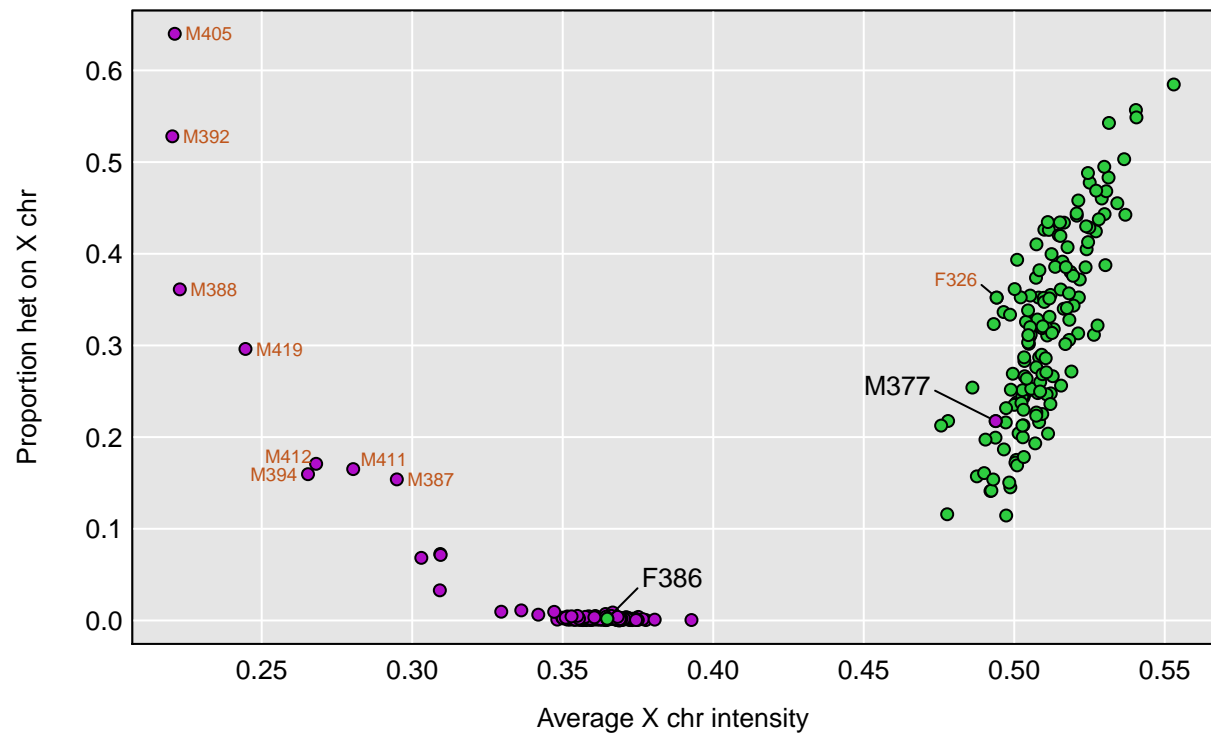

**Figure S1** Proportion of heterozygous SNPs on the X chromosome versus the average microarray intensity for markers on the X chromosome, for each mouse. Mice that were nominally male are in purple, while females are in green. Samples with  $\geq 20\%$  missing data are labeled in orange. Two other samples of interest are labeled in black: F386 which appears to be XO, and M377 which was nominally male but appears to be XX.
