# Supplementary material
Source: publisher figshare collection journal article supplement (https://gsajournals.figshare.com/articles/dataset/_/7848395)
Supplement: Supplementary file 5 [file 1]

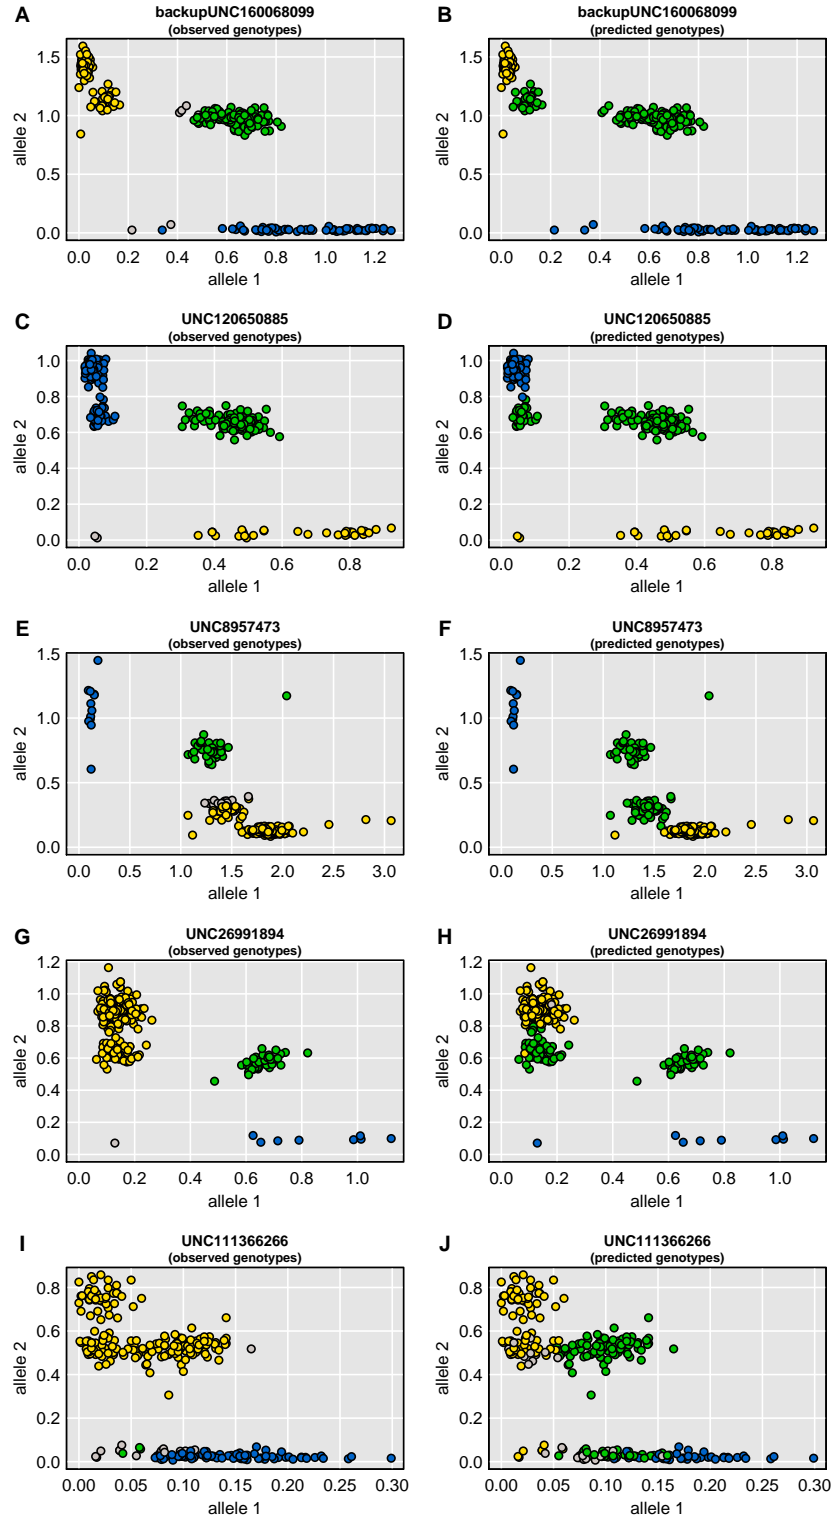

**Figure S5** Allele intensity plots for examples of SNPs with an additional genotype cluster. In the left panels, points are colored according to the genotype calls, with yellow and blue being the two homozygotes and green being the heterozygote; gray points were not called. In the right panels, points are colored by the inferred SNP genotypes, given the multipoint marker data and the founders' genotypes; gray points could not be inferred.
