# Supplementary material
Source: publisher figshare collection journal article supplement (https://gsajournals.figshare.com/articles/dataset/_/7848395)
Supplement: Supplementary file 6 [file 1]

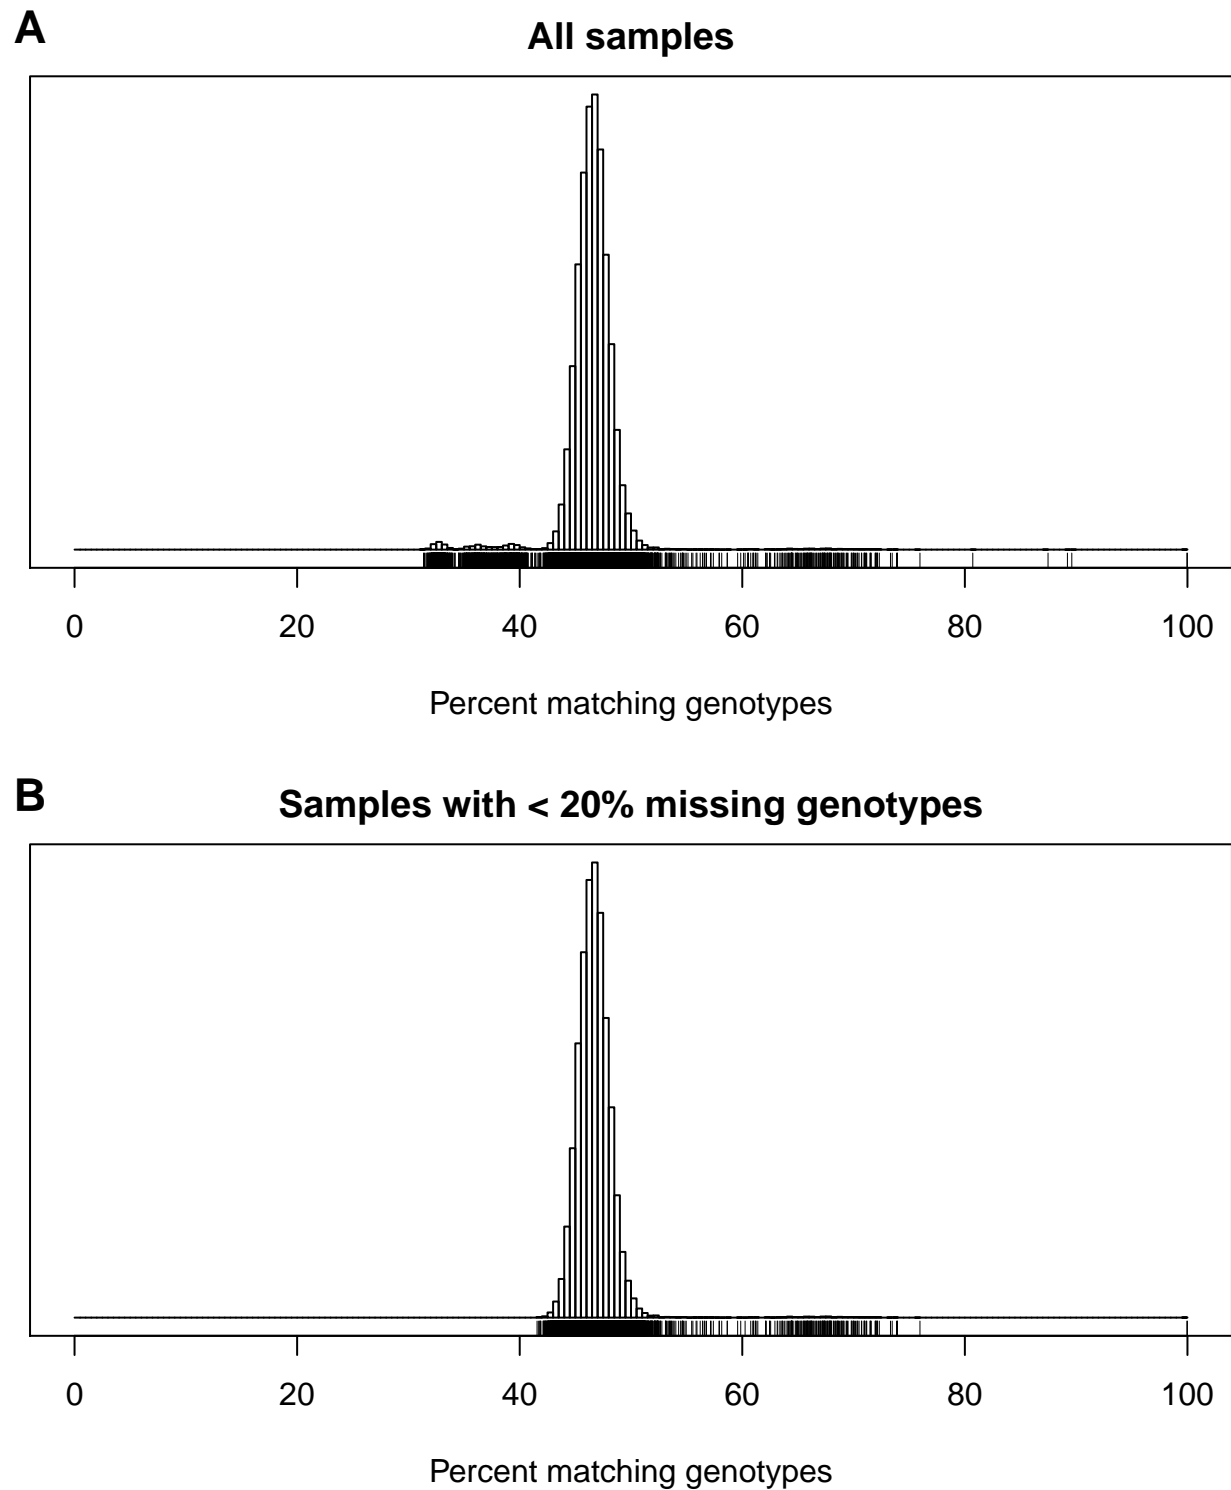

**Figure S2** Distribution of percent matching genotypes for pairs of mice. **A:** all samples. **B:** samples with < 20% missing genotypes. Tick marks below the histograms indicate the values for individual pairs.
