# Supplementary material
Source: publisher figshare collection journal article supplement (https://gsajournals.figshare.com/articles/dataset/_/7848395)
Supplement: Supplementary file 7 [file 1]

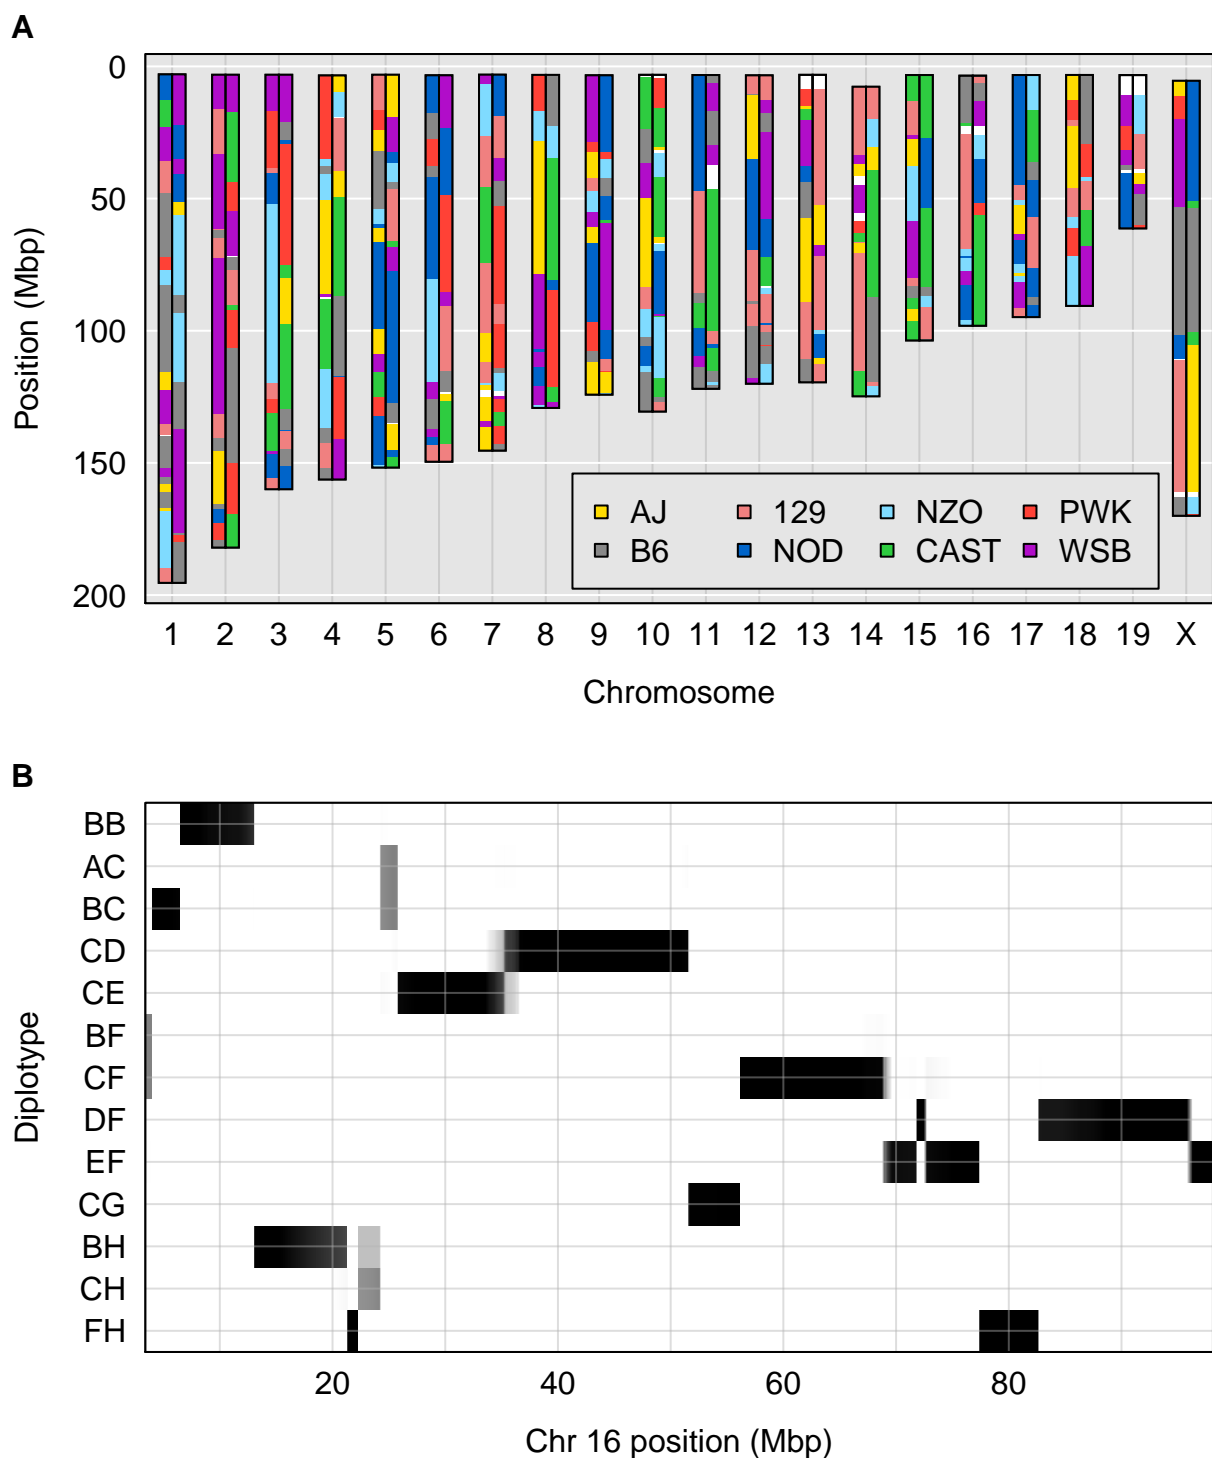

**Figure S3** Illustration of genome reconstruction. **A:** Inferred diplotype across the genome for mouse F413, with an arbitrary choice of phase. (For example, if there is a region of homozygosity, the haplotypes above can be swapped relative to the haplotypes below.) White indicates unknown (no diplotype had probability  $>0.5$ ). **B:** Heat map of the diplotype probabilities for mouse F413 along chromosome 16. Only diplotypes that achieved probability  $> 0.25$  are shown.
